# Supplementary material for: Dietary, socioeconomic, and maize handling practices associated with aflatoxin and fumonisin exposure among women tortilla makers in 5 departments in Guatemala
Source: PubMed Central journal article supplement (PMC10849247; doi:10.1371/journal.pgph.0001623), 2024-02-07
Supplement: pgph.0001623.s002.pdf [file pgph.0001623.s002.pdf]

## Supplemental Material

Dietary, socioeconomic, and maize handling practices associated with aflatoxin and fumonisin exposure among women tortilla makers in 5 departments in Guatemala

Ariel V. Garsow, Olga R. Torres, Jorge A. Matute, Danielle M. Voss, Gonzalo Miyagusuku-Cruzado, M. Monica Giusti, Barbara B. Kowalczyk

Cod Totilleria \_ \_ \_

### SURVEY TOOL -- Module 1: TORTILLERIA

"Estimating mycotoxin exposure and improving food safety in Guatemala"

(CIENSA, February 2022)

|                                                                                                                                                                                                                                   |
|-----------------------------------------------------------------------------------------------------------------------------------------------------------------------------------------------------------------------------------|
| <b>Study title:</b> Estimation of mycotoxin exposure and increased food security in Guatemala<br><b>Researchers:</b> Barbara Kowalczyk, Olga Torres, Ariel Garsow<br><b>Sponsors:</b> Private Donor and The Ohio State University |
|-----------------------------------------------------------------------------------------------------------------------------------------------------------------------------------------------------------------------------------|

#### I. General Information about the Tortilleria

Paste ID sticker HERE

|                                                                                                               |                                                                       |
|---------------------------------------------------------------------------------------------------------------|-----------------------------------------------------------------------|
| <b>0. Tortilleria ID</b> _____                                                                                |                                                                       |
| 1. Department: _____ 2. Code _____                                                                            | Guatemala = 1, Sololá = 2, Suchitepéquez = 3, Izabal = 4, Zacapa = 5. |
| 3. Municipality _____ 4. Code _____                                                                           |                                                                       |
| 5. Neighborhood/Colony _____ 6. Code _____                                                                    |                                                                       |
| 7. Longitude _____ 8. Latitude _____                                                                          | 9. Temperature _____ C 10. Humidity _____ %                           |
| 11. Time when the information for the previous variables _____. _____ hours                                   |                                                                       |
| 12. Name of the tortilleria _____                                                                             | 13. Address _____                                                     |
| 14. Tortilleria owner name _____                                                                              | 15. Cell phone number _____                                           |
| 16. Number of people working in tortilleria ____ 1. Owner ____ 2. family ____ 3. employee ____                |                                                                       |
| 17. Person who gives information about the tortilleria: 1. Owner: ____ 2. family ____ 3. employee ____        |                                                                       |
| 18. Name of the person interviewed _____ 19. Age _____ years                                                  |                                                                       |
| <b>20. Survey components:</b> 1. Questionnaire ____ 2. corn sample ____                                       |                                                                       |
| 3. Sample of tortillas ____ 4. Urine sample ____                                                              |                                                                       |
| 21. Language interview was conducted: 1. Spanish __ 2. Kaqchikel __ 3. Tz'utujil __ 4. K'iche' __ 5. Other __ |                                                                       |
| 22. Date ____ / ____ / 2022 23. Interviewer name _____ Cod _____                                              |                                                                       |

#### II. Conditions of the material of the tortilleria and storage of the corn

| Site conditions or tortilleria (99 = Could not be observed) |             |       |         |       |
|-------------------------------------------------------------|-------------|-------|---------|-------|
| Aspects to qualify                                          | Tortilleria | Cod   | Storage | Cod   |
| II. 1 Material that predominates on the floor?              | _____       | _____ | _____   | _____ |
| II. 2 Material that predominates on the walls?              | _____       | _____ | _____   | _____ |
| II. 3 Material that predominates in the ceiling?            | _____       | _____ | _____   | _____ |

III: Corn and tortilla making

| Questions                                                                                                       | Answer Options                                                                                                       | Codes                                |
|-----------------------------------------------------------------------------------------------------------------|----------------------------------------------------------------------------------------------------------------------|--------------------------------------|
| <b>Origin, purchase of corn and storage</b>                                                                     |                                                                                                                      |                                      |
| III. 1 What do you/ <i>do you all use</i> to prepare the dough of the tortillas you make in this tortilla shop? | 1. Corn only?<br>2. Only maseca?<br>3. Corn and maseca?<br>4. Corn and 1. Sorghum, 2. Rice, 3. barley 4. Other _____ | 1 ____<br>2 ____<br>3 ____<br>4 ____ |
| III.2 What color is the corn you use/ <i>Do you use</i> to make tortillas?                                      | 1. White 2. Yellow 3: Black 4. Corinth<br>5. Other (E) _____                                                         | _____                                |

|                                                                                                                                      |                                                                                                                                                                                                                                                              |                                                                              |
|--------------------------------------------------------------------------------------------------------------------------------------|--------------------------------------------------------------------------------------------------------------------------------------------------------------------------------------------------------------------------------------------------------------|------------------------------------------------------------------------------|
| III. 3 Almost always, what corn do you/ <i>use</i> to make tortillas is...                                                           | 1. Harvested? , or -- ( <i>homegrown</i> )---<br>2. Purchased?<br>3. Other ( <i>specify</i> ) _____                                                                                                                                                          | _____                                                                        |
| <b>A. Harvested maize</b>                                                                                                            |                                                                                                                                                                                                                                                              |                                                                              |
| III. 4 Is corn harvested within the municipality?                                                                                    | 1. Yes, <i>Community</i> _____ <i>Cod</i> ____<br>0.No<br>2. Don't know → Skip to question III.7                                                                                                                                                             | _____                                                                        |
| III. 5 Approximate distance from harvest community to tortilleria ____ <i>kilometers</i>                                             |                                                                                                                                                                                                                                                              |                                                                              |
| III.6 How do you transport harvested corn from the place where it is harvested to this place?                                        | 1. By land<br>2. By water (sea, lake, river)<br>3. Don't know/Don't respond                                                                                                                                                                                  | 1 ____<br>2 ____<br>3 ____                                                   |
| <b>If the corn for tortillas is entirely homegrown, go to question III.12→</b>                                                       |                                                                                                                                                                                                                                                              |                                                                              |
| <b>B. Maize purchased:</b>                                                                                                           |                                                                                                                                                                                                                                                              |                                                                              |
| III. 7 Here in _____<br>Where do you buy/ <i>buy</i> mainly the corn you use/use to make the tortillas?                              | 1. Producer's truck<br>2. Intermediary truck<br>3. Producer's boat<br>4. Intermediary boat<br>5. Warehouse/warehouse/market seller/terminal<br>6. Private shop/Deposit (outside of the market)<br>7. Shop/grocery store<br>8. Other ( <i>specify</i> ) _____ | 1 ____<br>2 ____<br>3 ____<br>4 ____<br>5 ____<br>6 ____<br>7 ____<br>8 ____ |
| III. 8 Do you know from which part of Guatemala comes the corn <b>that is bought</b> to make the masa with which tortillas are made? | 1. Yes<br>0. Do not → go to question III. 11<br>3. Don't Know/Don't Answer Move → to Question Move to Question III.11                                                                                                                                        | _____                                                                        |
| III. 9 Where does the corn <b>that is bought</b> to make the tortillas come from?                                                    |                                                                                                                                                                                                                                                              |                                                                              |
| <b>Answer Options</b>                                                                                                                | <b>Codes</b>                                                                                                                                                                                                                                                 | <b>Answer Options</b>                                                        |
| 1. South Coast                                                                                                                       |                                                                                                                                                                                                                                                              | 5. Peten                                                                     |
| 2. North                                                                                                                             |                                                                                                                                                                                                                                                              | 6. Central Plateau                                                           |
| 3. East                                                                                                                              |                                                                                                                                                                                                                                                              | 7. Mexico                                                                    |
| 4. The West                                                                                                                          |                                                                                                                                                                                                                                                              | 8. Other place <i>specify</i>                                                |
| III. 10 How do you transport the corn that is bought to make the tortillas, from the place where it is harvested?                    | 1. By land<br>2. By water (sea, lake, river)<br>3. Don't know/Don't respond                                                                                                                                                                                  | 1 ____<br>2 ____<br>3 ____                                                   |
| III. 11 Most of the time, the corn <b>that is bought</b> to make the tortillas...<br>( <i>Read answer options 1 and 2</i> )          | 1. Do you buy it daily?, → Skip to question III.20<br>2. Do you buy it for a longer time and keep it?<br>3. Use harvested corn                                                                                                                               | _____                                                                        |

|                                                                                                                    |                                                                                 |                       |
|--------------------------------------------------------------------------------------------------------------------|---------------------------------------------------------------------------------|-----------------------|
| III. 12 How long do you keep or store the corn before using it to make the tortillas?                              | 1. Less than a week<br>2. One week<br>3. More than a week ___ D / ___ S / ___ M | ___                   |
| III.13 How do you store or store the corn you use to make these tortillas?<br><i>(Read answer options 1 and 2)</i> | 1. On the cob?, or<br>2. In grain?                                              | ___                   |
| III. 14 Where do you keep or store the corn you use to make tortillas?                                             |                                                                                 |                       |
| <b>Answer Options</b>                                                                                              | <b>Codes</b>                                                                    | <b>Answer Options</b> |
| 1. Troja                                                                                                           |                                                                                 | 5. Silo               |
| 2. Sack                                                                                                            |                                                                                 | 6. Other              |
| 3. Barrel / barrel                                                                                                 |                                                                                 |                       |

|                                                                                                                                                                                        |                                                                                                                                |                                                    |   |   |   |   |   |   |    |
|----------------------------------------------------------------------------------------------------------------------------------------------------------------------------------------|--------------------------------------------------------------------------------------------------------------------------------|----------------------------------------------------|---|---|---|---|---|---|----|
| III.15 Could I see where you keep the corn that you use/use to make the tortillas?                                                                                                     | 1. Yes<br>2. The place is very secluded/locked<br><b>99.</b> They declined observation → Move to question III.17               | ___                                                |   |   |   |   |   |   |    |
| <b>Observation:</b><br>III.16 What are the conditions of the place where this corn is stored?                                                                                          | <b>Aspects to observe:</b>                                                                                                     | <b>YES</b>                                         |   |   |   |   |   |   |    |
|                                                                                                                                                                                        | 1. Is it ventilated?                                                                                                           | <b>1</b>                                           |   |   |   |   |   |   |    |
|                                                                                                                                                                                        | 2. It is illuminated: <i>natural</i> ___ <i>artificial</i> ___                                                                 | <b>1</b>                                           |   |   |   |   |   |   |    |
|                                                                                                                                                                                        | 3. Is it wet?                                                                                                                  | <b>1</b>                                           |   |   |   |   |   |   |    |
|                                                                                                                                                                                        | 4. Is it clean?                                                                                                                | <b>1</b>                                           |   |   |   |   |   |   |    |
|                                                                                                                                                                                        | 5. Is it used only to store corn?                                                                                              | <b>1</b>                                           |   |   |   |   |   |   |    |
|                                                                                                                                                                                        | 6. Completely closed / Presence of holes? Yes ___ No ___                                                                       | <b>1</b>                                           |   |   |   |   |   |   |    |
|                                                                                                                                                                                        | 7. Are there pallets/ If they are metal, are they rusty? Yes ___ No ___                                                        | <b>1</b>                                           |   |   |   |   |   |   |    |
|                                                                                                                                                                                        |                                                                                                                                | <b>NO</b>                                          |   |   |   |   |   |   |    |
|                                                                                                                                                                                        |                                                                                                                                | <b>0</b>                                           |   |   |   |   |   |   |    |
|                                                                                                                                                                                        |                                                                                                                                | <b>0</b>                                           |   |   |   |   |   |   |    |
|                                                                                                                                                                                        |                                                                                                                                | <b>0</b>                                           |   |   |   |   |   |   |    |
|                                                                                                                                                                                        |                                                                                                                                | <b>0</b>                                           |   |   |   |   |   |   |    |
|                                                                                                                                                                                        |                                                                                                                                | <b>0</b>                                           |   |   |   |   |   |   |    |
|                                                                                                                                                                                        |                                                                                                                                | <b>0</b>                                           |   |   |   |   |   |   |    |
| <b>Quality of maize observed during the interview</b>                                                                                                                                  |                                                                                                                                |                                                    |   |   |   |   |   |   |    |
| <b>Observation:</b><br>III.17 How is the presentation of the corn used to make the tortillas?                                                                                          | 1. Whole<br>2. Broken<br>3. Chopped<br>4. With deteriorated natural color<br>5. Rotten<br>6. Other ( <i>specify</i> ) _____    | 1 ___<br>2 ___<br>3 ___<br>4 ___<br>5 ___<br>6 ___ |   |   |   |   |   |   |    |
| <b>Observation:</b><br>III.18 Does the corn used to make tortillas have contaminants or foreign materials?                                                                             | <b>Aspects to observe:</b>                                                                                                     | <b>Quantity</b>                                    |   |   |   |   |   |   |    |
|                                                                                                                                                                                        | 1. It doesn't have, it's clean                                                                                                 |                                                    |   |   |   |   |   |   |    |
|                                                                                                                                                                                        | 2. Roots, leaves, garbage                                                                                                      | ___                                                |   |   |   |   |   |   |    |
|                                                                                                                                                                                        | 3. Stones, sticks                                                                                                              | ___                                                |   |   |   |   |   |   |    |
|                                                                                                                                                                                        | 4. Weevils                                                                                                                     | ___                                                |   |   |   |   |   |   |    |
|                                                                                                                                                                                        | 5. Earth, dust, garbage                                                                                                        | <i>Present</i> ___ <i>absent</i> ___               |   |   |   |   |   |   |    |
|                                                                                                                                                                                        | 6. Other (E) _____                                                                                                             | ___                                                |   |   |   |   |   |   |    |
| <b>Observation:</b><br>III.19 Does the corn used to make tortillas have any strong or noticeable odors?                                                                                | 1. It does not have<br>2. A fertilizer/herbicide/fungicide<br>3. A stale?<br>4. A rotten?<br>5. Other ( <i>specify</i> ) _____ | 1 ___<br>2 ___<br>3 ___<br>4 ___<br>5 ___          |   |   |   |   |   |   |    |
| III. 20 How long ago was the last time you bought /bought corn to make the tortillas you sell in this place? 1) ___ days 2) ___ weeks 3) ___ NS/NR →Skip to question 6) of this III.20 |                                                                                                                                |                                                    |   |   |   |   |   |   |    |
| 4) Do you know where the corn you bought last time came from?                                                                                                                          | 1                                                                                                                              | 2                                                  | 3 | 4 | 5 | 6 | 7 | 8 | NS |
| 5) Did you keep corn from what you bought last time? 1. Yes ___ 2. No ___ → P III. 21                                                                                                  | Quantity / Unit: ___ / ___                                                                                                     |                                                    |   |   |   |   |   |   |    |

|                                                                                                                                          |                                                                                                                                                                                                                                             |                            |
|------------------------------------------------------------------------------------------------------------------------------------------|---------------------------------------------------------------------------------------------------------------------------------------------------------------------------------------------------------------------------------------------|----------------------------|
| 6) How much corn is stored from the one you bought last time?                                                                            |                                                                                                                                                                                                                                             | Quantity / Unit: ___ / ___ |
| III.21 How was the corn that you bought this last time to make the tortillas? (Read answer options, on each item)                        |                                                                                                                                                                                                                                             |                            |
| a. 1. Whole?, 2 broken?, 3. picado?, or 4. rotten?                                                                                       |                                                                                                                                                                                                                                             | ___ / ___ / ___ / ___      |
| b. 1. Clean?, 2. con roots, 3. con stones, or earth, or with 4. weevils?                                                                 |                                                                                                                                                                                                                                             | ___ / ___ / ___ / ___      |
| c. 1. With the smell of fertilizers/herbicides?, 2. Rancid, or smelling 3. rotten?                                                       |                                                                                                                                                                                                                                             | ___ / ___ / ___            |
| d. 99. Didn't review it / Doesn't remember                                                                                               |                                                                                                                                                                                                                                             | ___                        |
| Preparation of tortillas                                                                                                                 |                                                                                                                                                                                                                                             |                            |
| III. 22 What do you do when <b>you</b> realize that the corn to prepare the tortillas has: fungal weevils, or is eaten by birds or mice? | 1. Discarded/Thrown Away<br>2. It is given to animals ( <i>pigs, poultry</i> )<br>3. Nothing, always used<br>4. Mix it with corn that has no harm<br>5. She / <i>they</i> always buy good quality corn<br>6. Other ( <i>specify</i> ) _____ | _____                      |

| III.23 Who is in charge of making the nixtamal para the dough with which they make the tortillas? (Ask the following question to the person in charge of preparing the nixtamal)                               | 1. The owner of the tortilleria<br>2. Another person<br>3. They always buy the ready-made dough → Ask for THE KNOWLEDGE of the nixtamalization process)                                                                                                                                                                                                                                                                                                                | _____                                                       |          |         |          |                       |                    |         |             |                      |                    |                 |         |               |  |  |
|----------------------------------------------------------------------------------------------------------------------------------------------------------------------------------------------------------------|------------------------------------------------------------------------------------------------------------------------------------------------------------------------------------------------------------------------------------------------------------------------------------------------------------------------------------------------------------------------------------------------------------------------------------------------------------------------|-------------------------------------------------------------|----------|---------|----------|-----------------------|--------------------|---------|-------------|----------------------|--------------------|-----------------|---------|---------------|--|--|
| III. 24 What are the steps you do/ <i>what do you</i> do to make the dough with which the tortillas are prepared, since the corn is obtained? (Read answer options 1 to 6) Do you know what the steps are... ? | ___ Do you soak in lime water, overnight?<br>___ Is it boiled with lime (Nixtamalized)?<br>___ Boils without lime?<br>___ Drains?<br>___ Is it washed several times with different water? ___ times<br>___ Is ground? (at home or in the motor mill)<br>7. Doesn't know                                                                                                                                                                                                | 1 ___<br>2 ___<br>3 ___<br>4 ___<br>5 ___<br>6 ___<br>7 ___ |          |         |          |                       |                    |         |             |                      |                    |                 |         |               |  |  |
| III. 25 How much corn, water and lime do <i>you use</i> to make tortilla dough? Do you know how much...?                                                                                                       | <table border="1"> <thead> <tr> <th>Ingredients (per grind)</th> <th>Quantity</th> </tr> </thead> <tbody> <tr> <td>1. Corn</td> <td>___ lb/a</td> </tr> <tr> <td>2. Water for nixtamal</td> <td>___ lt / bot / gal</td> </tr> <tr> <td>3. Lime</td> <td>___ oz / lb</td> </tr> <tr> <td>4. Water for washing</td> <td>___ lt / bot / gal</td> </tr> <tr> <td>5. Boiling time</td> <td>___ h/m</td> </tr> <tr> <td>6. Don't know</td> <td></td> </tr> </tbody> </table> | Ingredients (per grind)                                     | Quantity | 1. Corn | ___ lb/a | 2. Water for nixtamal | ___ lt / bot / gal | 3. Lime | ___ oz / lb | 4. Water for washing | ___ lt / bot / gal | 5. Boiling time | ___ h/m | 6. Don't know |  |  |
| Ingredients (per grind)                                                                                                                                                                                        | Quantity                                                                                                                                                                                                                                                                                                                                                                                                                                                               |                                                             |          |         |          |                       |                    |         |             |                      |                    |                 |         |               |  |  |
| 1. Corn                                                                                                                                                                                                        | ___ lb/a                                                                                                                                                                                                                                                                                                                                                                                                                                                               |                                                             |          |         |          |                       |                    |         |             |                      |                    |                 |         |               |  |  |
| 2. Water for nixtamal                                                                                                                                                                                          | ___ lt / bot / gal                                                                                                                                                                                                                                                                                                                                                                                                                                                     |                                                             |          |         |          |                       |                    |         |             |                      |                    |                 |         |               |  |  |
| 3. Lime                                                                                                                                                                                                        | ___ oz / lb                                                                                                                                                                                                                                                                                                                                                                                                                                                            |                                                             |          |         |          |                       |                    |         |             |                      |                    |                 |         |               |  |  |
| 4. Water for washing                                                                                                                                                                                           | ___ lt / bot / gal                                                                                                                                                                                                                                                                                                                                                                                                                                                     |                                                             |          |         |          |                       |                    |         |             |                      |                    |                 |         |               |  |  |
| 5. Boiling time                                                                                                                                                                                                | ___ h/m                                                                                                                                                                                                                                                                                                                                                                                                                                                                |                                                             |          |         |          |                       |                    |         |             |                      |                    |                 |         |               |  |  |
| 6. Don't know                                                                                                                                                                                                  |                                                                                                                                                                                                                                                                                                                                                                                                                                                                        |                                                             |          |         |          |                       |                    |         |             |                      |                    |                 |         |               |  |  |
| III. 25a How long is corn boiled? Do you know how long...?                                                                                                                                                     | How many torteadas do you do a day? ___ torteadas<br>How many tortillas are made in C/torteadas? ___ tortillas<br>How many tortillas are made per day? ___ tortillas                                                                                                                                                                                                                                                                                                   |                                                             |          |         |          |                       |                    |         |             |                      |                    |                 |         |               |  |  |
| III.26 What kind of fuel do you/ <i>Do you use</i> to prepare the mase and make the tortillas?                                                                                                                 |                                                                                                                                                                                                                                                                                                                                                                                                                                                                        |                                                             |          |         |          |                       |                    |         |             |                      |                    |                 |         |               |  |  |
| Answer Options                                                                                                                                                                                                 | Codes                                                                                                                                                                                                                                                                                                                                                                                                                                                                  | Answer Options                                              |          |         |          |                       |                    |         |             |                      |                    |                 |         |               |  |  |
| 1. Firewood                                                                                                                                                                                                    |                                                                                                                                                                                                                                                                                                                                                                                                                                                                        | 4. Electricity                                              |          |         |          |                       |                    |         |             |                      |                    |                 |         |               |  |  |
| 2. Coal                                                                                                                                                                                                        |                                                                                                                                                                                                                                                                                                                                                                                                                                                                        | 5. Other (E)                                                |          |         |          |                       |                    |         |             |                      |                    |                 |         |               |  |  |
| 3. Propane gas                                                                                                                                                                                                 |                                                                                                                                                                                                                                                                                                                                                                                                                                                                        |                                                             |          |         |          |                       |                    |         |             |                      |                    |                 |         |               |  |  |
| III. 27 Where do they get the water they use to make tortilla dough?                                                                                                                                           |                                                                                                                                                                                                                                                                                                                                                                                                                                                                        |                                                             |          |         |          |                       |                    |         |             |                      |                    |                 |         |               |  |  |
| Answer Options                                                                                                                                                                                                 | Codes                                                                                                                                                                                                                                                                                                                                                                                                                                                                  | Answer Options                                              |          |         |          |                       |                    |         |             |                      |                    |                 |         |               |  |  |
| 1. Own jet                                                                                                                                                                                                     |                                                                                                                                                                                                                                                                                                                                                                                                                                                                        | 4. Public/relative or neighbor well                         |          |         |          |                       |                    |         |             |                      |                    |                 |         |               |  |  |
| 2. Public jet / relative or neighbor                                                                                                                                                                           |                                                                                                                                                                                                                                                                                                                                                                                                                                                                        | 5. River, lake, spring                                      |          |         |          |                       |                    |         |             |                      |                    |                 |         |               |  |  |
| 3. Own well                                                                                                                                                                                                    |                                                                                                                                                                                                                                                                                                                                                                                                                                                                        | Other (E)                                                   |          |         |          |                       |                    |         |             |                      |                    |                 |         |               |  |  |

Risk factors for aflatoxin and fumonisin exposure in Guatemala, Garsow et al.

|                                                                                                                                                                  |                                                                                                                                                                                                                                                              |                                                                      |
|------------------------------------------------------------------------------------------------------------------------------------------------------------------|--------------------------------------------------------------------------------------------------------------------------------------------------------------------------------------------------------------------------------------------------------------|----------------------------------------------------------------------|
| <p><b>III. 28</b> What do you/<i>do</i> with the water you use for nixtamal and washing?<br/>-----<br/><i>What would you do with....?</i></p>                    | <p>1. Use it again to soak, nixtamalize or drain<br/>2. They use it to prepare other foods<br/>3. They give it to animals (<i>pigs, poultry</i>)<br/>4. They throw it away or discard it<br/>5. Other (<i>specify</i>) _____<br/><b>6. Don't know</b></p>    | <p>1 ____<br/>2 ____<br/>3 ____<br/>4 ____<br/>5 ____</p>            |
| <p><b>III.29</b> After preparing the tortillas, what do you <i>do</i> with the dough that is left over?<br/>-----<br/><i>What would usted/ do you do...?</i></p> | <p>1 They keep it to make tortillas of the next time/day<br/>2. They use it for other preparations<br/>3. Discard it thrown away or give to animals<br/>4. Makes dough atol / fresh dough<br/>5. Other (<i>specify</i>) _____<br/><b>6. Doesn't know</b></p> | <p>1 ____<br/>2 ____<br/>3 ____<br/>4 ____<br/>5 ____<br/>6 ____</p> |

## SURVEY TOOL -- Module 2: WOMEN

"Estimating mycotoxin exposure and improving food safety in Guatemala"  
(CIENSA, February 2022)**Study title:** Estimation of mycotoxin exposure and increased food security in Guatemala**Researchers:** Barbara Kowalczyk, Olga Torres, Ariel Garsow**Sponsors:** Private Donor and The Ohio State University

## I. General information of the woman interviewed

Paste ID sticker HERE

|                                                                                                                                  |                                                                          |
|----------------------------------------------------------------------------------------------------------------------------------|--------------------------------------------------------------------------|
| 0. Tortilleria ID _____                                                                                                          |                                                                          |
| 1. Department: _____ Code _____                                                                                                  | Guatemala = 1, Sololá = 2, Suchitepéquez = 3,<br>Izabal = 4, Zacapa = 5. |
| 3. Municipality: _____ Code _____                                                                                                |                                                                          |
| 5. Neighborhood/Colony _____ Code _____                                                                                          |                                                                          |
| 7. Name of the tortilleria _____ 8. Code _____                                                                                   | 9. Cell phone number _____                                               |
| 10. Roles of the people who work in the tortilleria : 1. Owner ___ 2. family ___ 3. employee ___                                 |                                                                          |
| 11. Selected person who gives information of <b>this survey</b> : 1. Owner: ___ 2. family member ___ employee ___                |                                                                          |
| 12. Name of interviewee _____ Age _____ years                                                                                    |                                                                          |
| <i>[Select this woman from those who want to participate in this study and give a urine sample]</i>                              |                                                                          |
| 14. Language in which the interview was conducted: 1. Español ___ 2. Kaqchikel ___ 3. Tz' utujil ___ 4. K'iché' ___ 5. Other ___ |                                                                          |
| 15. Date ____ / ____ / 2022 16. Interviewer _____ Cod _____                                                                      |                                                                          |

## II. Characteristics of the woman interviewed and her home

| Questions                                       | Answer Options                                                  | Codes                                                |
|-------------------------------------------------|-----------------------------------------------------------------|------------------------------------------------------|
| II.1 Marital status of the interviewee          | 1. Married 2. United 3. Single 4. Widow 5. Divorced 6. Separate |                                                      |
| II. 2 Formal education of the woman interviewed | Can you read? ___<br>Do you know how to write? ___              | _____ Degree _____ Code _____ Level _____ Code _____ |
| II. 3 Where are you?,<br>Where were you born?   | Community _____<br>Municipality _____<br>Department _____       | Code _____<br>Code _____<br>Code _____               |
| II.4 How long ago did you leave your community? | _____ months _____ years                                        |                                                      |

Part III. Consumption of prepared corn-based foods, during the last week

| Did you eat ____ / Did you drink ____ last week? |                          |                              |                                         |                                                     | <i>Note: Consider all foods consumed by the target person, both at home and outside of the home, regardless of where they were prepared.</i> |                       |
|--------------------------------------------------|--------------------------|------------------------------|-----------------------------------------|-----------------------------------------------------|----------------------------------------------------------------------------------------------------------------------------------------------|-----------------------|
| No                                               | Food:                    | If you ate it or drank it... |                                         |                                                     | Units                                                                                                                                        | Grams                 |
|                                                  |                          | 1 = Yes<br>0 = No            | How many days a week did you eat/drink? | How much ____ Did you eat/drink in these ____ days? |                                                                                                                                              |                       |
| 1                                                | Tortillas                | 1 0                          | _____                                   | _____. ____                                         | or                                                                                                                                           | 40                    |
| 2                                                | Little Tamales           | 1 0                          | _____                                   | _____. ____                                         | or                                                                                                                                           | 200                   |
| 3                                                | Tamales                  | 1 0                          | _____                                   | _____. ____                                         | or                                                                                                                                           | 55                    |
| 4                                                | Chuchitos                | 1 0                          | _____                                   | _____. ____                                         | or                                                                                                                                           | 75                    |
| 5                                                | Sleeps                   | 1 0                          | _____                                   | _____. ____                                         | or                                                                                                                                           | 65                    |
| 6                                                | Toast                    | 1 0                          | _____                                   | _____. ____                                         | or                                                                                                                                           | 25                    |
| 7                                                | Nachos                   | 1 0                          | _____                                   | _____. ____                                         | u/b                                                                                                                                          | 5 / 60                |
| 8                                                | Tortrix                  | 1 0                          | _____                                   | _____. ____                                         | b                                                                                                                                            | 40                    |
| 9                                                | Pinol                    | 1 0                          | _____                                   | _____. ____                                         | cd/oz/lb /tz                                                                                                                                 | 8 /28.7 / 454 / 95    |
| 10                                               | Tayuyos / Tones          | 1 0                          | _____                                   | _____. ____                                         | or                                                                                                                                           | 55                    |
| 11                                               | Mass water               | 1 0                          | _____                                   | _____. ____                                         | v / tz / C                                                                                                                                   | 20 / 20/ 20           |
| 12                                               | Mass atol                | 1 0                          | _____                                   | _____. ____                                         | v / tz / C                                                                                                                                   | 40 / 40 / 40          |
| 13                                               | Corn coffee              | 1 0                          | _____                                   | _____. ____                                         | cd/ v /tz                                                                                                                                    | 12 /12 /12            |
| 14                                               | Corn atol                | 1 0                          | _____                                   | _____. ____                                         | v / tz / C                                                                                                                                   | 40 / 40 / 40          |
| 15                                               | Corn<br>(roasted/cooked) | 1 0                          | _____                                   | _____. ____                                         | or                                                                                                                                           | 115                   |
| 16                                               | Cornstarch               | 1 0                          | _____                                   | _____. ____                                         | cd / oz/lb/ tz                                                                                                                               | 12 /28.7 /454 / 12    |
| 17                                               | Polenta (CSB)            | 1 0                          | _____                                   | _____. ____                                         | cd / oz/lb/ tz                                                                                                                               | 14 /28.7 /454 / 14    |
| 18                                               | Corn flakes              | 1 0                          | _____                                   | _____. ____                                         | cd / tz                                                                                                                                      | 7 / 45                |
| 19                                               | Incaparina               | 1 0                          | _____                                   | _____. ____                                         | cd / oz / lb-b / bp tz                                                                                                                       | 14 /28.7 /454 / 75 14 |
| 20                                               | Tacos                    | 1 0                          | _____                                   | _____. ____                                         | or                                                                                                                                           | 35                    |
| 21                                               | Other food               | 1 0                          | _____                                   | _____. ____                                         | u/cd / oz /lb/ ____                                                                                                                          | _____                 |

| Unit abbreviations |                      |
|--------------------|----------------------|
| CD                 | = tablespoon         |
| C                  | = ladle              |
| or                 | = unit               |
| Oz                 | = ounce              |
| Lb                 | = pound              |
| b                  | = bag                |
| BP                 | = sachet (small bag) |
| tz                 | = cup                |
| v                  | = glass              |
