# Supplementary material for: Dietary, socioeconomic, and maize handling practices associated with aflatoxin and fumonisin exposure among women tortilla makers in 5 departments in Guatemala
Source: PubMed Central journal article supplement (PMC10849247; doi:10.1371/journal.pgph.0001623), 2024-02-07
Supplement: pgph.0001623.s003.pdf [file pgph.0001623.s003.pdf]

## Supplemental Material

Dietary, socioeconomic, and maize handling practices associated with aflatoxin and fumonisin exposure among women tortilla makers in 5 departments in Guatemala

Ariel V. Garsow, Olga R. Torres, Jorge A. Matute, Danielle M. Voss, Gonzalo Miyagusuku-Cruzado, M. Monica Giusti, Barbara B. Kowalczyk

Cod Tortillería \_\_\_\_

### INSTRUMENTO DE RECOLECCIÓN DE DATOS -- Módulo 1: TORTILLERÍA

“Estimando la exposición a micotoxinas y mejorando la inocuidad alimentaria en Guatemala”

(CIENSA, febrero de 2022)

|                                                                                                                                                                                                                                                                      |
|----------------------------------------------------------------------------------------------------------------------------------------------------------------------------------------------------------------------------------------------------------------------|
| <b>Título del estudio:</b> Estimación de exposición a micotoxinas e incremento de la seguridad alimentaria en Guatemala<br><b>Investigadores:</b> Barbara Kowalczyk, Olga Torres, Ariel Garsow<br><b>Patrocinadores:</b> Donante privado y The Ohio State University |
|----------------------------------------------------------------------------------------------------------------------------------------------------------------------------------------------------------------------------------------------------------------------|

#### I. Información general de la tortillería

Pegar calcomanía de ID AQUÍ

|                                                                                                                                 |                     |
|---------------------------------------------------------------------------------------------------------------------------------|---------------------|
| <b>0. ID de la tortillería</b> _____                                                                                            |                     |
| 1. Departamento: _____                                                                                                          | 2. Código _____     |
| Guatemala = 1, Sololá = 2, Suchitepéquez = 3, Izabal = 4, Zacapa = 5.                                                           |                     |
| 3. Municipio _____                                                                                                              | 4. Código _____     |
| 5. Barrio/Colonia _____                                                                                                         | 6. Código _____     |
| 7. Longitud _____                                                                                                               | 8. Latitud _____    |
| 9. Temperatura _____ C                                                                                                          | 10. Humedad _____ % |
| 11. hora en que se tomó la información de las variables anteriores ____ . ____ horas                                            |                     |
| 12. Nombre de la tortillería _____                                                                                              | 13. Dirección _____ |
| 14. Nombre de la dueña de la tortillería _____                                                                                  | 15. Celular _____   |
| 16. Número de personas que trabajan en la tortillería ____ 1. Dueña ____ 2. familiar ____ 3. empleada ____                      |                     |
| 17. Persona que da información de la tortillería: 1. Dueña: ____ 2. familiar ____ 3. empleada ____                              |                     |
| 18. Nombre de la persona entrevistada _____                                                                                     |                     |
| 19. Edad ____ años                                                                                                              |                     |
| <b>20. Componentes de la encuesta:</b> 1. Cuestionario ____ 2. muestra de maíz ____                                             |                     |
| 3. Muestra de tortillas ____ 4. Muestra de orina ____                                                                           |                     |
| 21. Idioma en la que se realizó la entrevista: 1. Español ____ 2. Kaqchikel ____ 3. Tz'utujil ____ 4. K'iche' ____ 5. Otro ____ |                     |
| 22. Fecha ____ / ____ / 2022                                                                                                    |                     |
| 23. Encuestador/a _____                                                                                                         |                     |
| 24. Cod _____                                                                                                                   |                     |

#### II. Condiciones de la vivienda de la tortillería y almacenamiento del maíz

| Condiciones del lugar o tortillería (99 = No se pudo observar) |             |      |                |      |
|----------------------------------------------------------------|-------------|------|----------------|------|
| Aspectos a calificar                                           | Tortillería | Cod  | Almacenamiento | Cod  |
| II.1 ¿Material que predomina en el piso?                       | _____       | ____ | _____          | ____ |
| II.2 ¿Material que predomina en las paredes?                   | _____       | ____ | _____          | ____ |
| II.3 ¿Material que predomina en el techo?                      | _____       | ____ | _____          | ____ |

**III: Maíz y elaboración de tortillas**

| Preguntas                                                                                                              | Opciones de respuesta                                                                                                    | Códigos                              |
|------------------------------------------------------------------------------------------------------------------------|--------------------------------------------------------------------------------------------------------------------------|--------------------------------------|
| <b>Procedencia, compra de maíz y almacenamiento</b>                                                                    |                                                                                                                          |                                      |
| <b>III.1</b> ¿Qué usa usted/ <i>usan ustedes</i> para preparar la masa de las tortillas que hacen en esta tortillería? | 1. Solo maíz?<br>2. Solo maseca?<br>3. Maíz y maseca?<br>4. Maíz y <b>1. Maicillo, 2. Arroz, 3. cebada 4. Otro</b> _____ | 1 ____<br>2 ____<br>3 ____<br>4 ____ |
| <b>III.2</b> ¿De qué color es el maíz que usa usted/ <i>Usan ustedes</i> para hacer las tortillas?                     | 1. Blanco 2. Amarillo 3: Negro 4. Corinto<br>5. Otro (E) _____                                                           | ____                                 |

|                                                                                                        |                                                                                                           |      |
|--------------------------------------------------------------------------------------------------------|-----------------------------------------------------------------------------------------------------------|------|
| <b>III.3</b> Casi siempre, ¿El maíz qué usa usted/ <i>usan ustedes</i> para hacer las tortillas es ... | 1. Cosechado? , o -- ( <i>cosecha propia</i> )---<br>2. Comprado?<br>3. Otro ( <i>especifique</i> ) _____ | ____ |
|--------------------------------------------------------------------------------------------------------|-----------------------------------------------------------------------------------------------------------|------|

| <b>A. Maíz cosechado</b>                                 |                                                                                              |      |
|----------------------------------------------------------|----------------------------------------------------------------------------------------------|------|
| <b>III.4</b> ¿El maíz es cosechado dentro del municipio? | 1. Si, <b>Comunidad</b> _____ <b>Cod</b> ____<br>0. No<br>2. No sabe → Pase a pregunta III.7 | ____ |

|                                                                                                       |  |  |
|-------------------------------------------------------------------------------------------------------|--|--|
| <b>III.5</b> Distancia aproximada desde comunidad de cosecha a la tortillería _____ <b>kilómetros</b> |  |  |
|-------------------------------------------------------------------------------------------------------|--|--|

|                                                                                                     |                                                                         |                            |
|-----------------------------------------------------------------------------------------------------|-------------------------------------------------------------------------|----------------------------|
| <b>III.6</b> ¿Cómo transportan el maíz cosechado, desde el lugar donde se cosecha hasta este lugar? | 1. Por tierra<br>2. Por agua (mar, lago, río)<br>3. No sabe/No responde | 1 ____<br>2 ____<br>3 ____ |
|-----------------------------------------------------------------------------------------------------|-------------------------------------------------------------------------|----------------------------|

**Si el maíz para las tortillas es totalmente de cosecha propia, → pase a pregunta III.12**

| <b>B. Maíz comprado:</b>                                                                                                             |                                                                                                                                                                                                                                                                                        |                                                                              |
|--------------------------------------------------------------------------------------------------------------------------------------|----------------------------------------------------------------------------------------------------------------------------------------------------------------------------------------------------------------------------------------------------------------------------------------|------------------------------------------------------------------------------|
| <b>III.7</b> Aquí en _____ ¿Dónde compra usted/ <i>compran ustedes</i> principalmente el maíz que usa/usan para hacer las tortillas? | 1. Camión del productor<br>2. Camión de intermediario<br>3. Lancha del productor<br>4. Lancha de intermediario<br>5. Bodega/depósito/vendedor de mercado/terminal<br>6. Bodega particular/Depósito (fuera de mercado)<br>7. Tienda/abarrotería<br>8. Otro ( <i>especifique</i> ) _____ | 1 ____<br>2 ____<br>3 ____<br>4 ____<br>5 ____<br>6 ____<br>7 ____<br>8 ____ |

|                                                                                                                                          |                                                                                                             |      |
|------------------------------------------------------------------------------------------------------------------------------------------|-------------------------------------------------------------------------------------------------------------|------|
| <b>III.8</b> ¿Sabe usted de que parte de Guatemala viene el maíz <b>que se compra</b> para hacer la masa con que se hacen las tortillas? | 1. Si<br>0. No → Pase a pregunta III. 11<br>3. No sabe/No responde Pase a pregunta → Pase a pregunta III.11 | ____ |
|------------------------------------------------------------------------------------------------------------------------------------------|-------------------------------------------------------------------------------------------------------------|------|

**III.9** ¿De dónde viene el maíz **que se compra** para hacer las tortillas?

| Opciones de respuesta | Códigos | Opciones de respuesta            | Códigos |
|-----------------------|---------|----------------------------------|---------|
| 1. Costa sur          |         | 5. Peten                         |         |
| 2. Norte              |         | 6. Meseta Central                |         |
| 3. Oriente            |         | 7. México                        |         |
| 4. Occidente          |         | 8. Otro lugar <i>especifique</i> |         |

|                                                                                                                  |                                                                         |                            |
|------------------------------------------------------------------------------------------------------------------|-------------------------------------------------------------------------|----------------------------|
| <b>III.10</b> ¿Cómo transportan el maíz que se compra para hacer las tortillas, desde el lugar donde se cosecha? | 1. Por tierra<br>2. Por agua (mar, lago, río)<br>3. No sabe/No responde | 1 ____<br>2 ____<br>3 ____ |
|------------------------------------------------------------------------------------------------------------------|-------------------------------------------------------------------------|----------------------------|

|                                                                                                                                                         |                                                                                                                                |                              |
|---------------------------------------------------------------------------------------------------------------------------------------------------------|--------------------------------------------------------------------------------------------------------------------------------|------------------------------|
| <b>III.11</b> La mayoría de las veces, el maíz <b>que se compra</b> para hacer las tortillas...<br>(Lea opciones de respuesta 1 y 2)                    | 1. Lo compran a diario?, → Pase a pregunta III.20<br>2. Lo compran para un mayor tiempo y lo guardan?<br>3. Usa maíz cosechado | _____                        |
| <b>III.12</b> Por cuanto tiempo guarda o almacena usted/ <i>usan ustedes</i> el maíz antes de usarlos para hacer las tortillas?                         | 1. Menos de una semana<br>2. Una semana<br>3. Más de una semana _____ <b>D</b> / _____ <b>S</b> / _____ <b>M</b>               | _____                        |
| <b>III.13</b> ¿Cómo guarda o almacena usted/ <i>almacenan ustedes</i> el maíz que usan para hacer estas tortillas?<br>(Lea opciones de respuesta 1 y 2) | 1. En mazorca?, o<br>2. En grano?                                                                                              | _____                        |
| <b>III.14</b> ¿Dónde guarda o almacena usted/Ustedes el maíz que usan para hacer las tortilla?                                                          |                                                                                                                                |                              |
| <b>Opciones de respuesta</b>                                                                                                                            | <b>Códigos</b>                                                                                                                 | <b>Opciones de respuesta</b> |
| 1. Troja                                                                                                                                                |                                                                                                                                | 5. Silo                      |
| 2. Costal                                                                                                                                               |                                                                                                                                | 6. Otro                      |
| 3. Tonel / barril                                                                                                                                       |                                                                                                                                |                              |

|                                                                                                                                                                                                                                                           |                                                                                                                                 |                                                                |
|-----------------------------------------------------------------------------------------------------------------------------------------------------------------------------------------------------------------------------------------------------------|---------------------------------------------------------------------------------------------------------------------------------|----------------------------------------------------------------|
| <b>III.15</b> ¿Podría ver donde guardan el maíz que usa usted/ <i>usan ustedes</i> para hacer las tortillas?                                                                                                                                              | 1. Si<br>2. El lugar está muy retirado/cerrado con llave<br><b>99.</b> No accedieron a la observación → Pase a pregunta III.17  | _____                                                          |
| <b>Observación:</b><br><b>III.16</b> ¿Cuáles son las condiciones que presenta el lugar donde se almacena este maíz?                                                                                                                                       | <b>Aspectos a observar:</b>                                                                                                     | <b>SI</b> <b>NO</b>                                            |
|                                                                                                                                                                                                                                                           | 1. Esta ventilado?                                                                                                              | 1      0                                                       |
|                                                                                                                                                                                                                                                           | 2. Está iluminado: <i>natural</i> ____ <i>artificial</i> ____                                                                   | 1      0                                                       |
|                                                                                                                                                                                                                                                           | 3. Está húmedo?                                                                                                                 | 1      0                                                       |
|                                                                                                                                                                                                                                                           | 4. Se encuentra limpio?                                                                                                         | 1      0                                                       |
|                                                                                                                                                                                                                                                           | 5. Se usa solamente para guardar el maíz?                                                                                       | 1      0                                                       |
|                                                                                                                                                                                                                                                           | 6. Completamente cerrado / <b>Presencia de hoyos?</b> Si ____ No ____                                                           | 1      0                                                       |
|                                                                                                                                                                                                                                                           | 7. Hay tarimas / Si son de metal, están oxidadas? Si ____ No ____                                                               | 1      0                                                       |
| <b>Calidad del maíz observado durante la entrevista</b>                                                                                                                                                                                                   |                                                                                                                                 |                                                                |
| <b>Observación:</b><br><b>III.17</b> ¿Cómo es la presentación del maíz que se usa para hacer las tortillas?                                                                                                                                               | 1. Entero<br>2. Quebrado<br>3. Picado<br>4. Con color natural deteriorado<br>5. Podrido<br>6. Otro ( <i>especifique</i> ) _____ | 1 _____<br>2 _____<br>3 _____<br>4 _____<br>5 _____<br>6 _____ |
| <b>Observación:</b><br><b>III.18</b> ¿Tiene contaminantes o materiales extraños, el maíz que se usa para hacer las tortillas?                                                                                                                             | <b>Aspectos a observar:</b>                                                                                                     | <b>Cantidad</b>                                                |
|                                                                                                                                                                                                                                                           | 1. No tiene, está limpio                                                                                                        | _____                                                          |
|                                                                                                                                                                                                                                                           | 2. Raíces, hojas, basura                                                                                                        | _____                                                          |
|                                                                                                                                                                                                                                                           | 3. Piedras, palos                                                                                                               | _____                                                          |
|                                                                                                                                                                                                                                                           | 4. Gorgojos                                                                                                                     | _____                                                          |
|                                                                                                                                                                                                                                                           | 5. Tierra, polvo, basura                                                                                                        | <i>Presente</i> ____ <i>ausente</i> ____                       |
|                                                                                                                                                                                                                                                           | 6. Otro ( E ) _____                                                                                                             | _____                                                          |
| <b>Observación:</b><br><b>III.19</b> ¿Tiene algún olor fuerte o perceptible, el maíz que se usa para hacer las tortillas?                                                                                                                                 | 1. No tiene<br>2. A fertilizante/herbicida/fungicida<br>3. A rancio?<br>4. A podrido?<br>5. Otro ( <i>especifique</i> ) _____   | 1 _____<br>2 _____<br>3 _____<br>4 _____<br>5 _____            |
| <b>III.20</b> ¿Hace cuánto fue la <b>última vez</b> que usted <b>compró</b> / <i>compraron</i> maíz para hacer las tortillas que vende en este lugar? 1) ____ <b>días</b> 2) ____ <b>semanas</b> 3) ____ <b>NS/NR</b> → Pase a pregunta 6) de esta III.20 |                                                                                                                                 |                                                                |

|                                                                                                                                                                 |                                                                                                                                                                                                                                                                     |   |   |   |   |   |   |   |    |
|-----------------------------------------------------------------------------------------------------------------------------------------------------------------|---------------------------------------------------------------------------------------------------------------------------------------------------------------------------------------------------------------------------------------------------------------------|---|---|---|---|---|---|---|----|
| 4) ¿Sabe de dónde viene el maíz que compró esta última vez?                                                                                                     | 1                                                                                                                                                                                                                                                                   | 2 | 3 | 4 | 5 | 6 | 7 | 8 | NS |
| 5) ¿Guardó maíz del que compró esta última vez? 1. Si ___ 2. No ___ → P III. 21                                                                                 | Cantidad / Unidad: ___ / ___                                                                                                                                                                                                                                        |   |   |   |   |   |   |   |    |
| 6) ¿Qué cantidad de maíz se encuentra guardado del que compró la última vez?                                                                                    | Cantidad / Unidad: ___ / ___                                                                                                                                                                                                                                        |   |   |   |   |   |   |   |    |
| III.21 ¿Cómo estaba el maíz que compró usted esta última vez para hacer las tortillas?<br>(Lea opciones de respuesta, en cada ítem)                             |                                                                                                                                                                                                                                                                     |   |   |   |   |   |   |   |    |
| a. 1. Entero?, 2 quebrado?, 3. picado?, ó 4. podrido?                                                                                                           | ___ / ___ / ___ / ___                                                                                                                                                                                                                                               |   |   |   |   |   |   |   |    |
| b. 1. Limpio?, 2. con raíces, 3. con piedras, o tierra, o con 4. gorgojos?                                                                                      | ___ / ___ / ___ / ___                                                                                                                                                                                                                                               |   |   |   |   |   |   |   |    |
| c. 1. Con olor a fertilizantes/herbicidas?, 2. Rancio, o con olor a 3. podrido?                                                                                 | ___ / ___ / ___                                                                                                                                                                                                                                                     |   |   |   |   |   |   |   |    |
| d. 99. No lo revisó / No se acuerda                                                                                                                             | ___                                                                                                                                                                                                                                                                 |   |   |   |   |   |   |   |    |
| <b>Preparación de tortillas (torteadado)</b>                                                                                                                    |                                                                                                                                                                                                                                                                     |   |   |   |   |   |   |   |    |
| III.22 ¿Qué hace usted/ <i>ustedes</i> cuando se da cuenta que el maíz para preparar las tortillas tiene: gorgojos hongos, o está comido por pájaros o ratones? | 1. Se descarta/Se tira<br>2. Se le da a los animales ( <i>cerdos, aves de corral</i> )<br>3. Nada, siempre se usa<br>4. Lo mezcla con maíz que no tiene daño<br>5. Ella / <i>ellas</i> siempre compra maíz de buena calidad<br>6. Otro ( <i>especifique</i> ) _____ |   |   |   |   |   |   |   |    |

|                                                                                                                                                                                                 |                                                                                                                                                                                                                                                  |                              |                |                                                    |
|-------------------------------------------------------------------------------------------------------------------------------------------------------------------------------------------------|--------------------------------------------------------------------------------------------------------------------------------------------------------------------------------------------------------------------------------------------------|------------------------------|----------------|----------------------------------------------------|
| III.23 ¿Quién se encarga de hacer el nixtamal para la masa con que hacen las tortillas?<br>(Haga la siguiente pregunta a la persona que se encarga de preparar el nixtamal)                     | 1. La dueña de la tortillería<br>2. Otra persona<br>3. Siempre compran la masa ya preparada → Pregunte por EL CONOCIMIENTO del proceso de nixtamalización)                                                                                       |                              |                | ___                                                |
| III.24 ¿Cuáles son los pasos que hace usted/ <i>que hacen ustedes</i> para hacer la masa con que se preparan las tortillas, desde que se consigue el maíz?<br>(Lea opciones de respuesta 1 a 6) | ___ Se remoja en agua cal, durante la noche?<br>___ Se hierve con cal (Nixtamalizado)?<br>___ Se hierve sin cal?<br>___ Se desagua?<br>___ Se lava varias veces con diferente agua? ___ veces<br>___ Se muele? (en casa o en el molino de motor) |                              |                | 1 ___<br>2 ___<br>3 ___<br>4 ___<br>5 ___<br>6 ___ |
| ¿Sabe usted cuales son los pasos...?                                                                                                                                                            | 7. No sabe                                                                                                                                                                                                                                       |                              |                | 7 ___                                              |
| III.25 ¿Qué cantidad de maíz, agua y cal usa usted / <i>usan ustedes</i> para hacer la masa de las tortillas?<br>¿Sabe usted que cantidad...?                                                   | <b>Ingredientes (por molida)</b>                                                                                                                                                                                                                 | <b>Cantidad</b>              |                |                                                    |
|                                                                                                                                                                                                 | 1. Maíz                                                                                                                                                                                                                                          | ___ lb / a                   |                |                                                    |
|                                                                                                                                                                                                 | 2. Agua para el nixtamal                                                                                                                                                                                                                         | ___ lt / bot / gal           |                |                                                    |
|                                                                                                                                                                                                 | 3. Cal                                                                                                                                                                                                                                           | ___ oz / lb                  |                |                                                    |
|                                                                                                                                                                                                 | 4. Agua para el lavado                                                                                                                                                                                                                           | ___ lt / bot/ gal            |                |                                                    |
|                                                                                                                                                                                                 | 5. Tiempo de hervido                                                                                                                                                                                                                             | ___ h / m                    |                |                                                    |
|                                                                                                                                                                                                 | 6. No sabe                                                                                                                                                                                                                                       |                              |                |                                                    |
| III.25a ¿Por cuánto tiempo se hierve el maíz?<br>¿Sabe usted por cuanto tiempo...?                                                                                                              | ¿Cuántas torteadas hacen al día? ___ torteadas<br>¿Cuántas tortillas se hacen en C/torteadas? ___ tortillas<br>¿Cuántas tortillas se hacen al día? ___ tortillas                                                                                 |                              |                |                                                    |
| III.26 ¿Qué clase de combustible usa usted/ <i>Usan ustedes</i> para preparar la mase y hacer las tortillas?                                                                                    |                                                                                                                                                                                                                                                  |                              |                |                                                    |
| <b>Opciones de respuesta</b>                                                                                                                                                                    | <b>Códigos</b>                                                                                                                                                                                                                                   | <b>Opciones de respuesta</b> | <b>Códigos</b> |                                                    |
| 1. Leña                                                                                                                                                                                         |                                                                                                                                                                                                                                                  | 4. Electricidad              |                |                                                    |
| 2. Carbón                                                                                                                                                                                       |                                                                                                                                                                                                                                                  | 5. Otro (E)                  |                |                                                    |
| 3. Gas propano                                                                                                                                                                                  |                                                                                                                                                                                                                                                  |                              |                |                                                    |
| III.27 ¿De dónde consiguen el agua que usan para hacer la masa de las tortillas?                                                                                                                |                                                                                                                                                                                                                                                  |                              |                |                                                    |

Risk factors for aflatoxin and fumonisin exposure in Guatemala, Garsow et al.

| Opciones de respuesta                                                                                                                                                                   | Códigos | Opciones de respuesta                                                                                                                                                                                                                                                  | Códigos                                                              |
|-----------------------------------------------------------------------------------------------------------------------------------------------------------------------------------------|---------|------------------------------------------------------------------------------------------------------------------------------------------------------------------------------------------------------------------------------------------------------------------------|----------------------------------------------------------------------|
| 1. Chorro propio                                                                                                                                                                        |         | 4. Pozo público/de pariente o vecino                                                                                                                                                                                                                                   |                                                                      |
| 2. Chorro público /de pariente o vecino                                                                                                                                                 |         | 5. Río, lago, manantial                                                                                                                                                                                                                                                |                                                                      |
| 3. Pozo propio                                                                                                                                                                          |         | Otro (E)                                                                                                                                                                                                                                                               |                                                                      |
| <p><b>III.28</b> ¿Qué hace usted/<i>hacen ustedes</i> con el agua que usan para el nixtamal y el lavado?<br/>-----<br/><i>¿Qué harían usted/ustedes con....?</i></p>                    |         | <p>1. La usan de nuevo para remojar, nixtamalizar o desaguar<br/>2. La usan para preparar otros alimentos<br/>3. La dan a los animales (<i>cerdos, aves de corral</i>)<br/>4. La tiran o descartan<br/>5. Otro (<i>especifique</i>) _____</p> <p><b>6. No sabe</b></p> | <p>1 ____<br/>2 ____<br/>3 ____<br/>4 ____<br/>5 ____</p>            |
| <p><b>III.29</b> Después de preparar las tortillas, ¿Qué hace usted/ <i>hacen ustedes</i> con la masa que le/s sobra?<br/>-----<br/><i>¿Qué haría usted/ que harían ustedes...?</i></p> |         | <p>1 La guardan para hacer tortillas del siguiente tiempo/día<br/>2. La usan para otras preparaciones<br/>3. La descartan tiran o dan a los animales<br/>4. Hace atol de masa /fresco de masa<br/>5. Otro (<i>especifique</i>) _____</p> <p><b>6. No sabe</b></p>      | <p>1 ____<br/>2 ____<br/>3 ____<br/>4 ____<br/>5 ____<br/>6 ____</p> |

**INSTRUMENTO DE RECOLECCIÓN DE DATOS -- Módulo 2: MUJER**  
**“Estimando la exposición a micotoxinas y mejorando la inocuidad alimentaria en Guatemala”**  
*(CIENSA, febrero de 2022)*

|                                                                                                                         |
|-------------------------------------------------------------------------------------------------------------------------|
| <b>Título del estudio:</b> Estimación de exposición a micotoxinas e incremento de la seguridad alimentaria en Guatemala |
| <b>Investigadores:</b> Barbara Kowalczyk, Olga Torres, Ariel Garsow                                                     |
| <b>Patrocinadores:</b> Donante privado y The Ohio State University                                                      |

**I. Información general de la mujer entrevistada**

Pegar calcomanía de ID AQUÍ

|                                                                                                                                 |                 |
|---------------------------------------------------------------------------------------------------------------------------------|-----------------|
| <b>0.</b> ID de la tortillería _____                                                                                            |                 |
| 1. Departamento: _____                                                                                                          | 2. Código _____ |
| Guatemala = 1, Sololá = 2, Suchitepéquez = 3, Izabal = 4, Zacapa = 5.                                                           |                 |
| 3. Municipio _____                                                                                                              | 4. Código _____ |
| 5 Barrio/Colonia _____                                                                                                          | 6. Código _____ |
| 7. Nombre de la tortillería _____                                                                                               | 8. Código _____ |
| 9. Celular _____                                                                                                                |                 |
| 10. Roles de las personas que trabajan en la tortillería : 1. Dueña ____ 2. familiar ____ 3. empleada ____                      |                 |
| 11. Persona <b>seleccionada</b> que da información de <b>Módulo Mujer</b> : 1. Dueña: ____ 2. familiar ____ empleada ____       |                 |
| 12. Nombre de la persona entrevistada _____                                                                                     |                 |
| 13. Edad ____ años                                                                                                              |                 |
| <i>[Seleccione esta mujer entre quienes quiere participar en este estudio y dar una muestra de orina]</i>                       |                 |
| 14. Idioma en la que se realizó la entrevista: 1. Español ____ 2. Kaqchikel ____ 3. Tz'utujil ____ 4. K'iche' ____ 5. Otro ____ |                 |
| 15. Fecha ____ / ____ / 2022                                                                                                    |                 |
| 16. Encuestador/a _____                                                                                                         |                 |
| 17. Cod _____                                                                                                                   |                 |

**II. Características de la mujer entrevistada y su hogar**

| Preguntas                                                    | Opciones de respuesta                                                                                      | Códigos                                      |
|--------------------------------------------------------------|------------------------------------------------------------------------------------------------------------|----------------------------------------------|
| <b>II.1</b> Estado civil de la entrevistada                  | 1. <i>Casada</i> 2. <i>Unida</i> 3. <i>Soltera</i> 4. <i>Viuda</i> 5. <i>Divorciada</i> 6. <i>Separada</i> |                                              |
| <b>II.2</b> Educación formal de la mujer entrevistada        | ¿Sabe leer? ____<br>¿Sabe escribir? ____<br>_____ Grado _____ Código _____ Nivel _____ Código _____        |                                              |
| <b>II.3</b> ¿Dé donde es usted?, Dónde nació?                | Comunidad _____<br>Municipio _____<br>Departamento _____                                                   | Código _____<br>Código _____<br>Código _____ |
| <b>II.4</b> ¿Hace cuánto tiempo salió usted de su comunidad? | _____ meses _____ años                                                                                     |                                              |

Parte III. Consumo de alimentos preparados a base de maíz, durante la última semana

| Comió Usted ____ / Tomó usted ____ la semana pasada? |                             |                       |                                         |                                              | <i>Nota: Considerar todos los alimentos consumidos por la persona objetivo, tanto en casa como fuera de ésta, independientemente donde se prepararon.</i> |                       |
|------------------------------------------------------|-----------------------------|-----------------------|-----------------------------------------|----------------------------------------------|-----------------------------------------------------------------------------------------------------------------------------------------------------------|-----------------------|
| No                                                   | Alimentos:                  | Si lo comió o tomo... |                                         | ¿Cuánto ____ comió /tomó en estos ____ días? | Unidades                                                                                                                                                  | Gramos                |
|                                                      |                             | 1 = Sí<br>0 = No      | ¿Cuántos días a la semana comió / Tomó? |                                              |                                                                                                                                                           |                       |
| 1                                                    | Tortillas                   | 1 0                   | _____                                   | _____.                                       | u                                                                                                                                                         | 40                    |
| 2                                                    | Tamales                     | 1 0                   | _____                                   | _____.                                       | u                                                                                                                                                         | 200                   |
| 3                                                    | Tamalitos                   | 1 0                   | _____                                   | _____.                                       | u                                                                                                                                                         | 55                    |
| 4                                                    | Chuchitos                   | 1 0                   | _____                                   | _____.                                       | u                                                                                                                                                         | 75                    |
| 5                                                    | Shepes                      | 1 0                   | _____                                   | _____.                                       | u                                                                                                                                                         | 65                    |
| 6                                                    | Tostadas                    | 1 0                   | _____                                   | _____.                                       | u                                                                                                                                                         | 25                    |
| 7                                                    | Nachos                      | 1 0                   | _____                                   | _____.                                       | u / b                                                                                                                                                     | 5 / 60                |
| 8                                                    | Tortrix                     | 1 0                   | _____                                   | _____.                                       | b                                                                                                                                                         | 40                    |
| 9                                                    | Pinol                       | 1 0                   | _____                                   | _____.                                       | cd / oz / lb / tz                                                                                                                                         | 8 /28.7 / 454 / 95    |
| 10                                                   | Tayuyos / Tones             | 1 0                   | _____                                   | _____.                                       | u                                                                                                                                                         | 55                    |
| 11                                                   | Agua de masa                | 1 0                   | _____                                   | _____.                                       | v / tz / C                                                                                                                                                | 20 / 20/ 20           |
| 12                                                   | Atol de masa                | 1 0                   | _____                                   | _____.                                       | v / tz / C                                                                                                                                                | 40 / 40 / 40          |
| 13                                                   | Café de maíz                | 1 0                   | _____                                   | _____.                                       | cd / v / tz                                                                                                                                               | 12 /12 / 12           |
| 14                                                   | Atol de elote               | 1 0                   | _____                                   | _____.                                       | v / tz / C                                                                                                                                                | 40 / 40 / 40          |
| 15                                                   | Elote <i>(asado/cocido)</i> | 1 0                   | _____                                   | _____.                                       | u                                                                                                                                                         | 115                   |
| 16                                                   | Maicena                     | 1 0                   | _____                                   | _____.                                       | cd / oz / lb / tz                                                                                                                                         | 12 /28.7 /454 / 12    |
| 17                                                   | Polenta (CSB)               | 1 0                   | _____                                   | _____.                                       | cd / oz / lb / tz                                                                                                                                         | 14 /28.7 /454 / 14    |
| 18                                                   | Corn flakes                 | 1 0                   | _____                                   | _____.                                       | cd / tz                                                                                                                                                   | 7 / 45                |
| 19                                                   | Incaparina                  | 1 0                   | _____                                   | _____.                                       | cd / oz / lb-b / bp tz                                                                                                                                    | 14 /28.7 /454 / 75 14 |
| 20                                                   | Tacos                       | 1 0                   | _____                                   | _____.                                       | u                                                                                                                                                         | 35                    |
| 21                                                   | Otro alimento               | 1 0                   | _____                                   | _____.                                       | u / cd /oz /lb / _____                                                                                                                                    | _____                 |

| Abreviaturas de las unidades |   |           |    |   |                                |
|------------------------------|---|-----------|----|---|--------------------------------|
| cd                           | = | cucharada | b  | = | bolsa                          |
| C                            | = | cucharón  | bp | = | bolsita <i>(bolsa pequeña)</i> |
| u                            | = | unidad    | tz | = | taza                           |
| oz                           | = | onza      | v  | = | vaso                           |

Risk factors for aflatoxin and fumonisin exposure in Guatemala, Garsow et al.

|           |   |              |  |
|-----------|---|--------------|--|
| <b>lb</b> | = | <b>libra</b> |  |
|-----------|---|--------------|--|
